# Supplementary material for: Structure Elucidation of Procyanidins Isolated from Rhododendron formosanum and Their Anti-Oxidative and Anti-Bacterial Activities
Source: MDPI journal article supplement (doi:10.3390/molecules200712787), 2015-07-15
Supplement: s1 [file s1]

# Supporting Materials

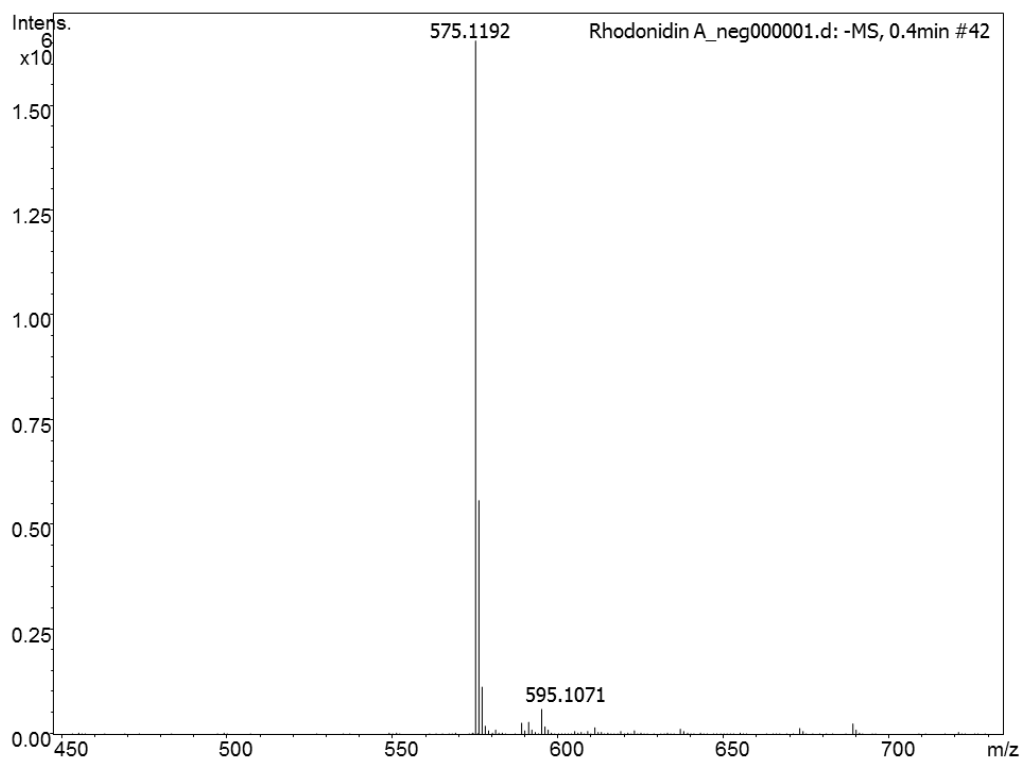

**Figure S1.** HR-ESIMS of **3**

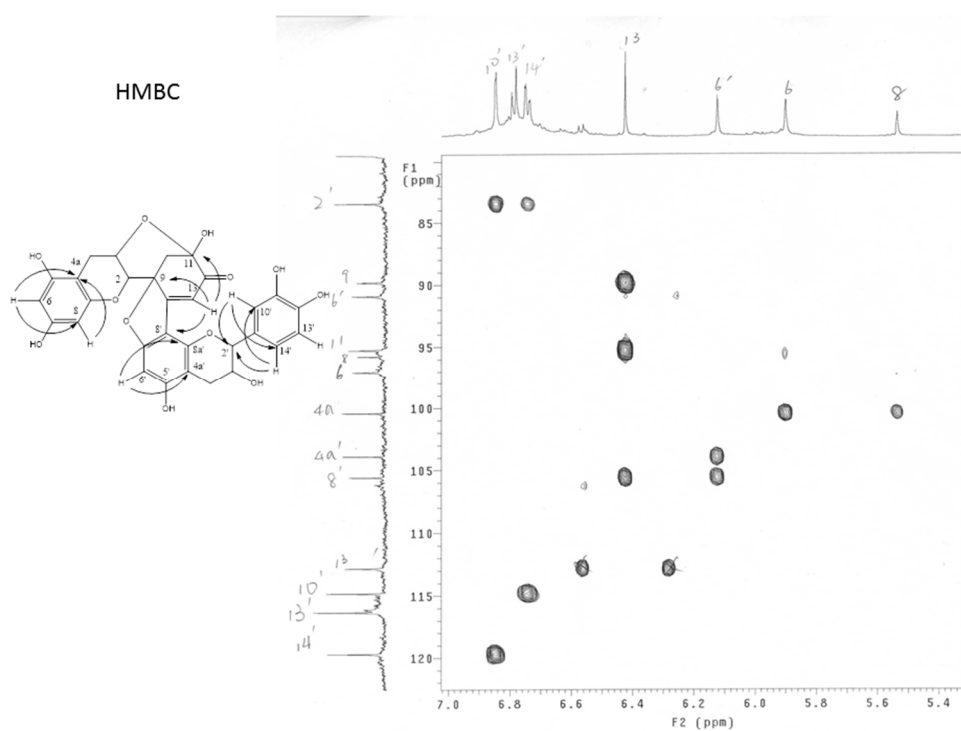

**Figure S2.** HMBC correlation of **3**.

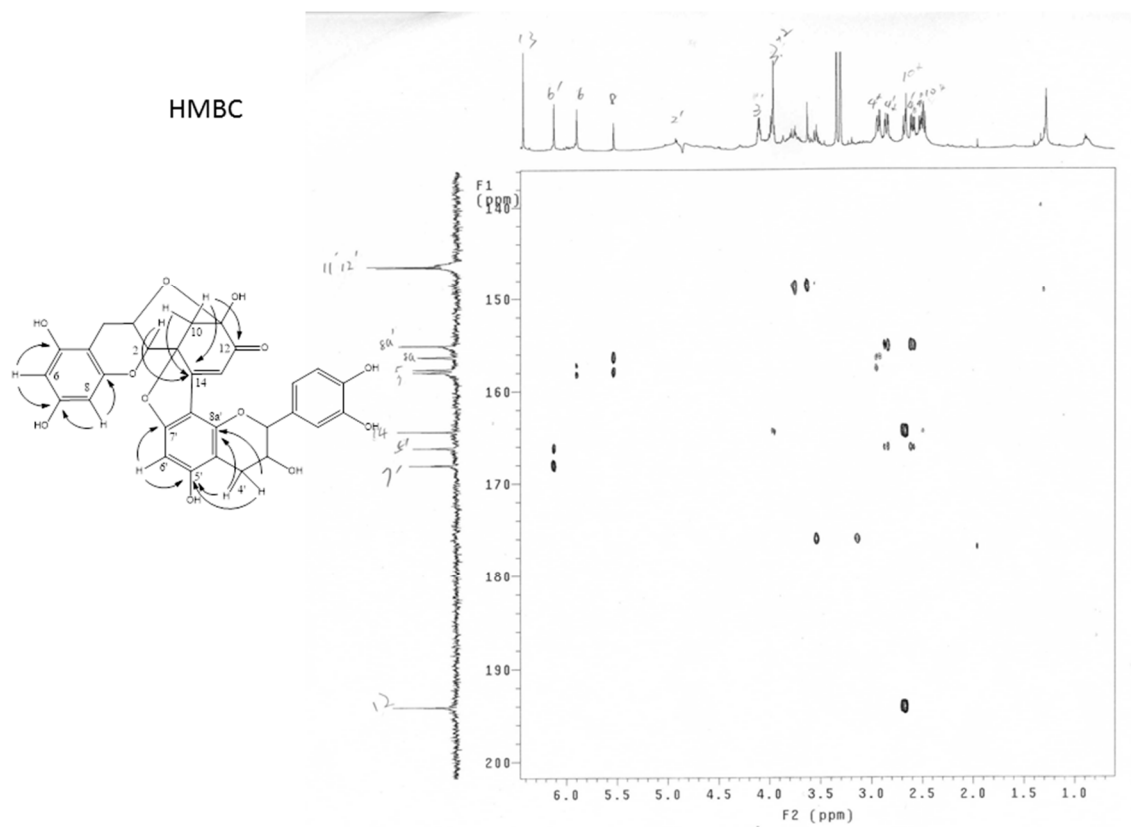

Figure S3. HMBC correlation of **3**, continued.

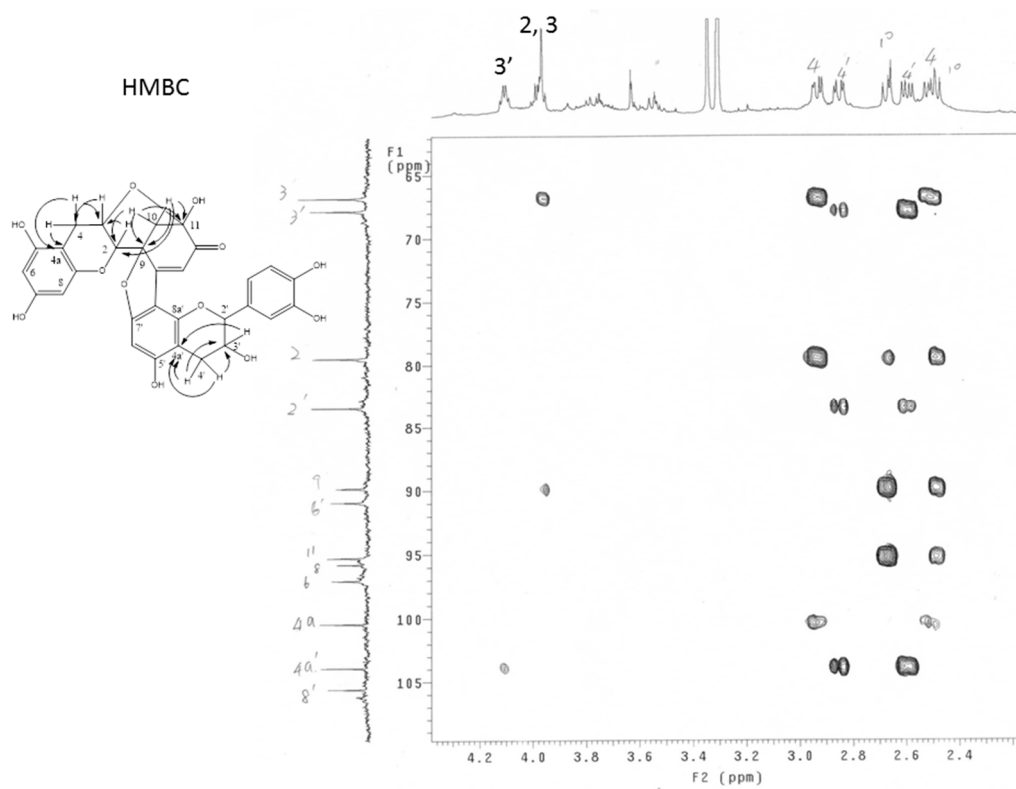

Figure S4. HMBC correlation of **3**, continued.

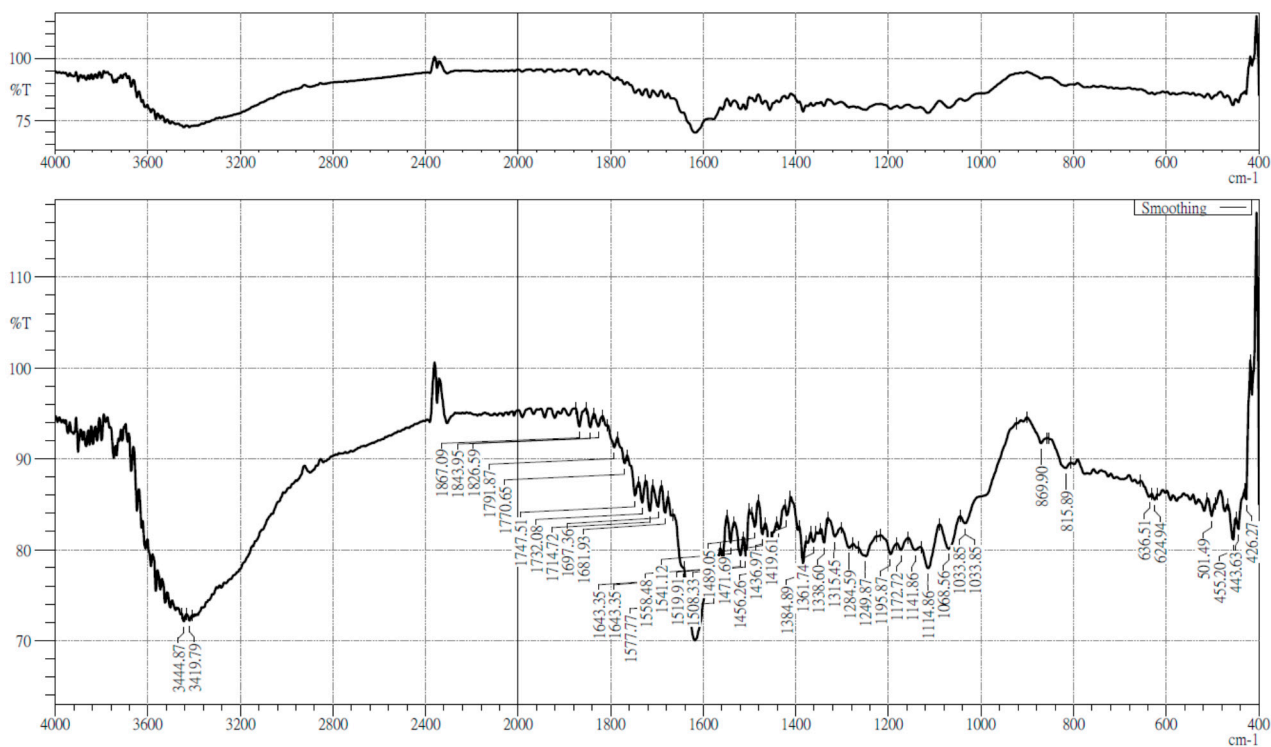

Figure S5. FT-IR spectrum of 3.

NOESY: Nuclear Overhauser Enhancement and Exchange Spectroscopy

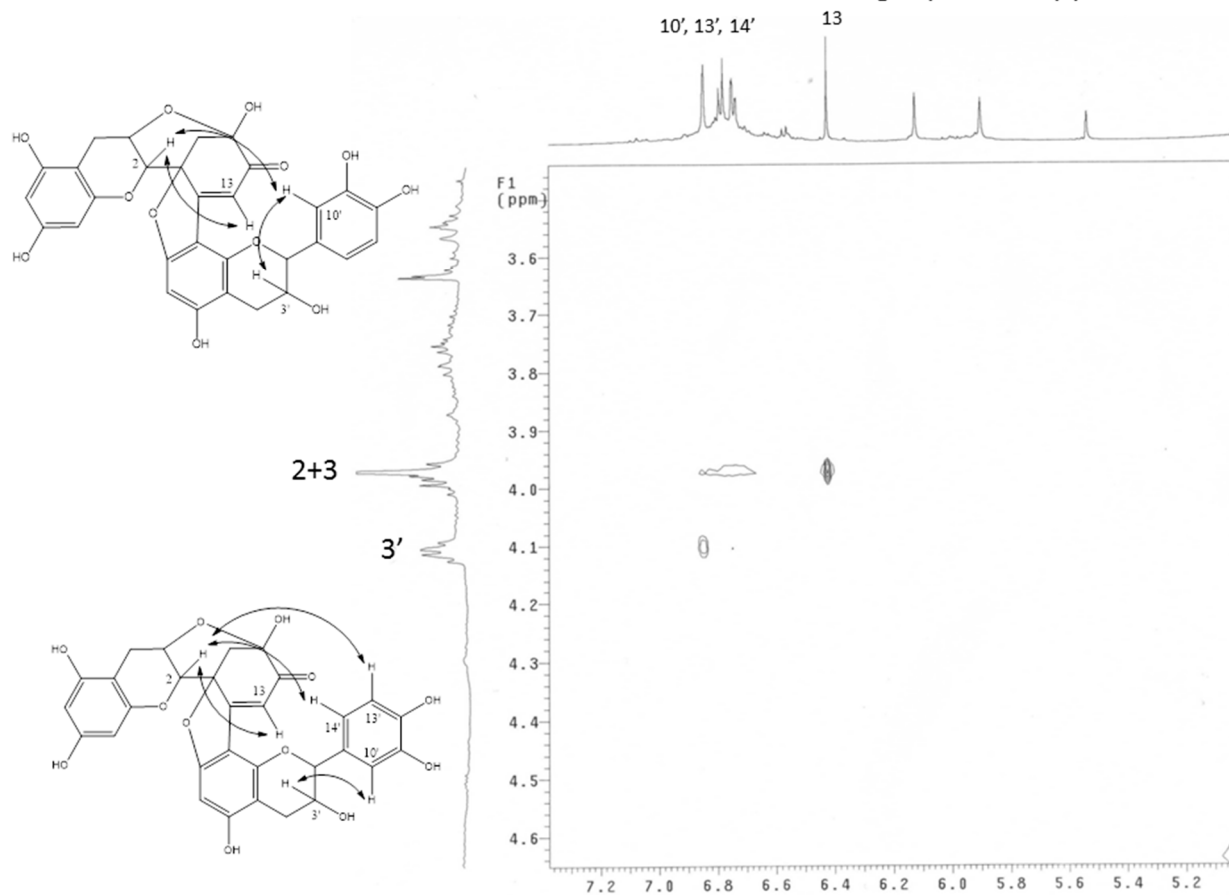

Figure S6. Selected NOE correlations of 3.
